# Supplementary material
Source: PubMed Central journal article supplement (PMC8694070)
Supplement: NIHMS1716342-supplement-bcor_SI.pdf [file NIHMS1716342-supplement-bcor_SI.pdf]

**Table 1:** Selected target regions of recurrently mutated genes (60) included in the study

| <b>Target</b> | <b>Chromosome</b> | <b>Start Position</b> | <b>End Position</b> |
|---------------|-------------------|-----------------------|---------------------|
| <i>APC</i>    | chr5              | 112043079             | 112043314           |
| <i>APC</i>    | chr5              | 112043249             | 112043488           |
| <i>APC</i>    | chr5              | 112043441             | 112043699           |
| <i>APC</i>    | chr5              | 112073527             | 112073799           |
| <i>APC</i>    | chr5              | 112074023             | 112074265           |
| <i>APC</i>    | chr5              | 112090535             | 112090793           |
| <i>APC</i>    | chr5              | 112101954             | 112102192           |
| <i>APC</i>    | chr5              | 112102757             | 112102993           |
| <i>APC</i>    | chr5              | 112102943             | 112103199           |
| <i>APC</i>    | chr5              | 112111277             | 112111517           |
| <i>APC</i>    | chr5              | 112116426             | 112116665           |
| <i>APC</i>    | chr5              | 112128064             | 112128294           |
| <i>APC</i>    | chr5              | 112136947             | 112137211           |
| <i>APC</i>    | chr5              | 112151121             | 112151357           |
| <i>APC</i>    | chr5              | 112154568             | 112154799           |
| <i>APC</i>    | chr5              | 112154744             | 112154973           |
| <i>APC</i>    | chr5              | 112154922             | 112155176           |
| <i>APC</i>    | chr5              | 112157554             | 112157818           |
| <i>APC</i>    | chr5              | 112162774             | 112163003           |
| <i>APC</i>    | chr5              | 112164426             | 112164661           |
| <i>APC</i>    | chr5              | 112164608             | 112164852           |
| <i>APC</i>    | chr5              | 112170523             | 112170754           |
| <i>APC</i>    | chr5              | 112170699             | 112170932           |
| <i>APC</i>    | chr5              | 112173141             | 112173366           |
| <i>APC</i>    | chr5              | 112173287             | 112173516           |
| <i>APC</i>    | chr5              | 112173429             | 112173654           |
| <i>APC</i>    | chr5              | 112173573             | 112173797           |
| <i>APC</i>    | chr5              | 112173713             | 112173940           |
| <i>APC</i>    | chr5              | 112173861             | 112174085           |
| <i>APC</i>    | chr5              | 112174001             | 112174225           |
| <i>APC</i>    | chr5              | 112174141             | 112174367           |
| <i>APC</i>    | chr5              | 112174283             | 112174507           |
| <i>APC</i>    | chr5              | 112174425             | 112174649           |
| <i>APC</i>    | chr5              | 112174577             | 112174806           |
| <i>APC</i>    | chr5              | 112174721             | 112174945           |
| <i>APC</i>    | chr5              | 112174863             | 112175087           |
| <i>APC</i>    | chr5              | 112175005             | 112175230           |
| <i>APC</i>    | chr5              | 112175145             | 112175370           |
| <i>APC</i>    | chr5              | 112175285             | 112175510           |
| <i>APC</i>    | chr5              | 112175431             | 112175655           |
| <i>APC</i>    | chr5              | 112175575             | 112175799           |

|              |       |           |           |
|--------------|-------|-----------|-----------|
| <i>APC</i>   | chr5  | 112175717 | 112175941 |
| <i>APC</i>   | chr5  | 112175865 | 112176090 |
| <i>APC</i>   | chr5  | 112176011 | 112176236 |
| <i>APC</i>   | chr5  | 112176157 | 112176381 |
| <i>APC</i>   | chr5  | 112176301 | 112176526 |
| <i>APC</i>   | chr5  | 112176473 | 112176710 |
| <i>APC</i>   | chr5  | 112176621 | 112176846 |
| <i>APC</i>   | chr5  | 112176761 | 112176985 |
| <i>APC</i>   | chr5  | 112176905 | 112177130 |
| <i>APC</i>   | chr5  | 112177049 | 112177274 |
| <i>APC</i>   | chr5  | 112177193 | 112177417 |
| <i>APC</i>   | chr5  | 112177335 | 112177559 |
| <i>APC</i>   | chr5  | 112177473 | 112177697 |
| <i>APC</i>   | chr5  | 112177621 | 112177846 |
| <i>APC</i>   | chr5  | 112177759 | 112177984 |
| <i>APC</i>   | chr5  | 112177913 | 112178141 |
| <i>APC</i>   | chr5  | 112178059 | 112178284 |
| <i>APC</i>   | chr5  | 112178209 | 112178433 |
| <i>APC</i>   | chr5  | 112178355 | 112178579 |
| <i>APC</i>   | chr5  | 112178491 | 112178717 |
| <i>APC</i>   | chr5  | 112178633 | 112178858 |
| <i>APC</i>   | chr5  | 112178777 | 112179003 |
| <i>APC</i>   | chr5  | 112178923 | 112179147 |
| <i>APC</i>   | chr5  | 112179063 | 112179290 |
| <i>APC</i>   | chr5  | 112179211 | 112179436 |
| <i>APC</i>   | chr5  | 112179387 | 112179611 |
| <i>APC</i>   | chr5  | 112179555 | 112179779 |
| <i>APC</i>   | chr5  | 112179723 | 112179948 |
| <i>APC</i>   | chr5  | 112179867 | 112180103 |
| <i>APC</i>   | chr5  | 112180045 | 112180319 |
| <i>APC</i>   | chr5  | 112180263 | 112180537 |
| <i>APC</i>   | chr5  | 112180461 | 112180686 |
| <i>APC</i>   | chr5  | 112180619 | 112180846 |
| <i>APC</i>   | chr5  | 112180785 | 112181031 |
| <i>APC</i>   | chr5  | 112180973 | 112181233 |
| <i>APC</i>   | chr5  | 112181179 | 112181407 |
| <i>APC</i>   | chr5  | 112181343 | 112181572 |
| <i>APC</i>   | chr5  | 112181489 | 112181744 |
| <i>APC</i>   | chr5  | 112181675 | 112181925 |
| <i>APC</i>   | chr5  | 112181869 | 112182118 |
| <i>ASXL1</i> | chr20 | 30946024  | 30946252  |
| <i>ASXL1</i> | chr20 | 30946180  | 30946454  |
| <i>ASXL1</i> | chr20 | 30946392  | 30946623  |
| <i>ASXL1</i> | chr20 | 30946574  | 30946831  |

|       |       |          |          |
|-------|-------|----------|----------|
| ASXL1 | chr20 | 30954154 | 30954402 |
| ASXL1 | chr20 | 30956786 | 30957028 |
| ASXL1 | chr20 | 30959840 | 30960065 |
| ASXL1 | chr20 | 30960010 | 30960234 |
| ASXL1 | chr20 | 31015802 | 31016027 |
| ASXL1 | chr20 | 31015966 | 31016192 |
| ASXL1 | chr20 | 31016140 | 31016379 |
| ASXL1 | chr20 | 31017114 | 31017370 |
| ASXL1 | chr20 | 31017675 | 31017949 |
| ASXL1 | chr20 | 31019007 | 31019233 |
| ASXL1 | chr20 | 31019183 | 31019421 |
| ASXL1 | chr20 | 31019375 | 31019602 |
| ASXL1 | chr20 | 31020652 | 31020912 |
| ASXL1 | chr20 | 31020960 | 31021186 |
| ASXL1 | chr20 | 31021134 | 31021365 |
| ASXL1 | chr20 | 31021310 | 31021536 |
| ASXL1 | chr20 | 31021486 | 31021751 |
| ASXL1 | chr20 | 31022110 | 31022337 |
| ASXL1 | chr20 | 31022260 | 31022485 |
| ASXL1 | chr20 | 31022410 | 31022634 |
| ASXL1 | chr20 | 31022550 | 31022777 |
| ASXL1 | chr20 | 31022696 | 31022920 |
| ASXL1 | chr20 | 31022842 | 31023066 |
| ASXL1 | chr20 | 31022982 | 31023206 |
| ASXL1 | chr20 | 31023126 | 31023350 |
| ASXL1 | chr20 | 31023268 | 31023492 |
| ASXL1 | chr20 | 31023412 | 31023636 |
| ASXL1 | chr20 | 31023558 | 31023783 |
| ASXL1 | chr20 | 31023706 | 31023931 |
| ASXL1 | chr20 | 31023852 | 31024076 |
| ASXL1 | chr20 | 31023996 | 31024220 |
| ASXL1 | chr20 | 31024140 | 31024365 |
| ASXL1 | chr20 | 31024290 | 31024514 |
| ASXL1 | chr20 | 31024434 | 31024660 |
| ASXL1 | chr20 | 31024580 | 31024804 |
| ASXL1 | chr20 | 31024726 | 31024951 |
| ASXL1 | chr20 | 31024868 | 31025092 |
| ASXL1 | chr20 | 31025022 | 31025249 |
| ASXL1 | chr20 | 31025174 | 31025398 |
| ASXL1 | chr20 | 31025312 | 31025537 |
| ASXL1 | chr20 | 31025454 | 31025678 |
| ASXL1 | chr20 | 31025596 | 31025822 |
| ASXL1 | chr20 | 31025752 | 31025978 |
| ASXL1 | chr20 | 31025926 | 31026172 |

|       |       |          |          |
|-------|-------|----------|----------|
| ASXL1 | chr20 | 31026116 | 31026343 |
| ASXL1 | chr20 | 31026298 | 31026522 |
| ASXL1 | chr20 | 31026472 | 31026696 |
| ASXL1 | chr20 | 31026642 | 31026875 |
| ASXL1 | chr20 | 31026822 | 31027093 |
| ASXL1 | chr20 | 31027042 | 31027301 |
| BCOR  | chrY  | 21635844 | 21636073 |
| BCOR  | chrY  | 21644557 | 21644778 |
| BCOR  | chrY  | 21645569 | 21645794 |
| BCOR  | chrX  | 39910376 | 39910619 |
| BCOR  | chrX  | 39910558 | 39910782 |
| BCOR  | chrX  | 39910710 | 39910943 |
| BCOR  | chrX  | 39910886 | 39911134 |
| BCOR  | chrX  | 39911078 | 39911320 |
| BCOR  | chrX  | 39911260 | 39911492 |
| BCOR  | chrX  | 39911438 | 39911703 |
| BCOR  | chrX  | 39913014 | 39913238 |
| BCOR  | chrX  | 39913180 | 39913408 |
| BCOR  | chrX  | 39913354 | 39913590 |
| BCOR  | chrX  | 39914590 | 39914848 |
| BCOR  | chrX  | 39916381 | 39916629 |
| BCOR  | chrX  | 39921271 | 39921519 |
| BCOR  | chrX  | 39921471 | 39921745 |
| BCOR  | chrX  | 39921878 | 39922102 |
| BCOR  | chrX  | 39922044 | 39922289 |
| BCOR  | chrX  | 39922734 | 39922964 |
| BCOR  | chrX  | 39922914 | 39923146 |
| BCOR  | chrX  | 39923092 | 39923337 |
| BCOR  | chrX  | 39923462 | 39923688 |
| BCOR  | chrX  | 39923636 | 39923906 |
| BCOR  | chrX  | 39930199 | 39930438 |
| BCOR  | chrX  | 39930823 | 39931055 |
| BCOR  | chrX  | 39931477 | 39931704 |
| BCOR  | chrX  | 39931623 | 39931847 |
| BCOR  | chrX  | 39931767 | 39931992 |
| BCOR  | chrX  | 39931917 | 39932142 |
| BCOR  | chrX  | 39932065 | 39932290 |
| BCOR  | chrX  | 39932211 | 39932435 |
| BCOR  | chrX  | 39932357 | 39932582 |
| BCOR  | chrX  | 39932497 | 39932723 |
| BCOR  | chrX  | 39932645 | 39932870 |
| BCOR  | chrX  | 39932791 | 39933016 |
| BCOR  | chrX  | 39932935 | 39933160 |
| BCOR  | chrX  | 39933077 | 39933301 |

|               |      |           |           |
|---------------|------|-----------|-----------|
| <i>BCOR</i>   | chrX | 39933217  | 39933442  |
| <i>BCOR</i>   | chrX | 39933519  | 39933746  |
| <i>BCOR</i>   | chrX | 39933679  | 39933905  |
| <i>BCOR</i>   | chrX | 39933859  | 39934084  |
| <i>BCOR</i>   | chrX | 39934035  | 39934268  |
| <i>BCOR</i>   | chrX | 39934215  | 39934474  |
| <i>BCOR</i>   | chrX | 39935676  | 39935939  |
| <i>BCOR</i>   | chrX | 39937070  | 39937312  |
| <i>BCOR</i>   | chrX | 39956359  | 39956628  |
| <i>BCOR</i>   | chrX | 39956577  | 39956847  |
| <i>BCOR</i>   | chrX | 40036147  | 40036419  |
| <i>BCOR</i>   | chrX | 40036367  | 40036640  |
| <i>BCORL1</i> | chrX | 129139133 | 129139373 |
| <i>BCORL1</i> | chrX | 129146527 | 129146785 |
| <i>BCORL1</i> | chrX | 129146803 | 129147030 |
| <i>BCORL1</i> | chrX | 129146965 | 129147191 |
| <i>BCORL1</i> | chrX | 129147113 | 129147337 |
| <i>BCORL1</i> | chrX | 129147253 | 129147478 |
| <i>BCORL1</i> | chrX | 129147397 | 129147622 |
| <i>BCORL1</i> | chrX | 129147541 | 129147765 |
| <i>BCORL1</i> | chrX | 129147693 | 129147918 |
| <i>BCORL1</i> | chrX | 129147837 | 129148061 |
| <i>BCORL1</i> | chrX | 129147981 | 129148205 |
| <i>BCORL1</i> | chrX | 129148135 | 129148361 |
| <i>BCORL1</i> | chrX | 129148283 | 129148507 |
| <i>BCORL1</i> | chrX | 129148433 | 129148658 |
| <i>BCORL1</i> | chrX | 129148585 | 129148809 |
| <i>BCORL1</i> | chrX | 129148727 | 129148952 |
| <i>BCORL1</i> | chrX | 129148873 | 129149097 |
| <i>BCORL1</i> | chrX | 129149045 | 129149270 |
| <i>BCORL1</i> | chrX | 129149215 | 129149441 |
| <i>BCORL1</i> | chrX | 129149387 | 129149611 |
| <i>BCORL1</i> | chrX | 129149559 | 129149792 |
| <i>BCORL1</i> | chrX | 129149745 | 129149970 |
| <i>BCORL1</i> | chrX | 129149919 | 129150153 |
| <i>BCORL1</i> | chrX | 129150101 | 129150359 |
| <i>BCORL1</i> | chrX | 129154933 | 129155204 |
| <i>BCORL1</i> | chrX | 129156847 | 129157079 |
| <i>BCORL1</i> | chrX | 129158840 | 129159067 |
| <i>BCORL1</i> | chrX | 129159010 | 129159236 |
| <i>BCORL1</i> | chrX | 129159182 | 129159423 |
| <i>BCORL1</i> | chrX | 129162483 | 129162714 |
| <i>BCORL1</i> | chrX | 129162663 | 129162935 |
| <i>BCORL1</i> | chrX | 129171315 | 129171576 |

|                |       |           |           |
|----------------|-------|-----------|-----------|
| <i>BCORL1</i>  | chrX  | 129173085 | 129173339 |
| <i>BCORL1</i>  | chrX  | 129184665 | 129184933 |
| <i>BCORL1</i>  | chrX  | 129185806 | 129186070 |
| <i>BCORL1</i>  | chrX  | 129189706 | 129189933 |
| <i>BCORL1</i>  | chrX  | 129189860 | 129190092 |
| <i>BCORL1</i>  | chrX  | 129190038 | 129190272 |
| <i>BCORL1</i>  | chrX  | 129190220 | 129190448 |
| <i>BCORL1</i>  | chrX  | 129190396 | 129190628 |
| <i>BCORL1</i>  | chrX  | 129190570 | 129190797 |
| <i>BCORL1</i>  | chrX  | 129190748 | 129190974 |
| <i>BCORL1</i>  | chrX  | 129190920 | 129191154 |
| <i>BCORL1</i>  | chrX  | 129191286 | 129191514 |
| <i>BCORL1</i>  | chrX  | 129191460 | 129191697 |
| <i>BCORL1</i>  | chrX  | 129191642 | 129191916 |
| <i>BCORL1</i>  | chrX  | 129191862 | 129192104 |
| <i>c5orf25</i> | chr5  | 175665259 | 175665525 |
| <i>c5orf25</i> | chr5  | 175665475 | 175665742 |
| <i>c5orf25</i> | chr5  | 175722110 | 175722373 |
| <i>c5orf25</i> | chr5  | 175749229 | 175749499 |
| <i>c5orf25</i> | chr5  | 175751603 | 175751873 |
| <i>c5orf25</i> | chr5  | 175763596 | 175763825 |
| <i>c5orf25</i> | chr5  | 175763770 | 175764004 |
| <i>c5orf25</i> | chr5  | 175763946 | 175764202 |
| <i>c5orf25</i> | chr5  | 175772059 | 175772283 |
| <i>c5orf25</i> | chr5  | 175772227 | 175772454 |
| <i>c5orf25</i> | chr5  | 175772399 | 175772634 |
| <i>c5orf25</i> | chr5  | 175772553 | 175772810 |
| <i>c5orf25</i> | chr5  | 175772755 | 175773008 |
| <i>c5orf25</i> | chr5  | 175772949 | 175773211 |
| <i>c5orf25</i> | chr5  | 177054275 | 177054538 |
| <i>c5orf25</i> | chr5  | 177098920 | 177099187 |
| <i>c5orf25</i> | chr5  | 177099137 | 177099404 |
| <i>CBL</i>     | chr11 | 119148794 | 119149030 |
| <i>CBL</i>     | chr11 | 119148974 | 119149230 |
| <i>CBL</i>     | chr11 | 119149174 | 119149430 |
| <i>CEBPA</i>   | chr19 | 33792274  | 33792498  |
| <i>CEBPA</i>   | chr19 | 33792896  | 33793131  |
| <i>CEBPA</i>   | chr19 | 33793080  | 33793354  |
| <i>CSF1R</i>   | chr5  | 149433617 | 149433842 |
| <i>CSF1R</i>   | chr5  | 149453017 | 149453287 |
| <i>CUX1</i>    | chr7  | 56978380  | 56978644  |
| <i>CUX1</i>    | chr7  | 63126368  | 63126632  |
| <i>cux1</i>    | chr7  | 101459265 | 101459534 |
| <i>CUX1</i>    | chr7  | 101460851 | 101461123 |

|      |      |           |           |
|------|------|-----------|-----------|
| CUX1 | chr7 | 101559366 | 101559608 |
| CUX1 | chr7 | 101671351 | 101671612 |
| CUX1 | chr7 | 101713588 | 101713856 |
| CUX1 | chr7 | 101740611 | 101740883 |
| CUX1 | chr7 | 101747571 | 101747799 |
| CUX1 | chr7 | 101754951 | 101755197 |
| CUX1 | chr7 | 101758428 | 101758688 |
| CUX1 | chr7 | 101801813 | 101802037 |
| CUX1 | chr7 | 101813697 | 101813965 |
| cux1 | chr7 | 101821626 | 101821860 |
| cux1 | chr7 | 101821812 | 101822072 |
| CUX1 | chr7 | 101833060 | 101833300 |
| CUX1 | chr7 | 101837093 | 101837325 |
| CUX1 | chr7 | 101838760 | 101839026 |
| CUX1 | chr7 | 101839809 | 101840049 |
| CUX1 | chr7 | 101839993 | 101840236 |
| CUX1 | chr7 | 101840163 | 101840392 |
| CUX1 | chr7 | 101840343 | 101840572 |
| CUX1 | chr7 | 101840523 | 101840768 |
| CUX1 | chr7 | 101842051 | 101842295 |
| CUX1 | chr7 | 101843320 | 101843592 |
| CUX1 | chr7 | 101844515 | 101844739 |
| CUX1 | chr7 | 101844657 | 101844882 |
| CUX1 | chr7 | 101844837 | 101845078 |
| CUX1 | chr7 | 101845025 | 101845259 |
| CUX1 | chr7 | 101845209 | 101845441 |
| CUX1 | chr7 | 101845395 | 101845652 |
| CUX1 | chr7 | 101848357 | 101848597 |
| CUX1 | chr7 | 101870528 | 101870779 |
| CUX1 | chr7 | 101870726 | 101870981 |
| CUX1 | chr7 | 101877207 | 101877446 |
| CUX1 | chr7 | 101877397 | 101877653 |
| CUX1 | chr7 | 101882471 | 101882716 |
| CUX1 | chr7 | 101882671 | 101882926 |
| CUX1 | chr7 | 101891573 | 101891816 |
| CUX1 | chr7 | 101891747 | 101892000 |
| CUX1 | chr7 | 101892491 | 101892717 |
| CUX1 | chr7 | 101892663 | 101892888 |
| CUX1 | chr7 | 101892825 | 101893049 |
| CUX1 | chr7 | 101892997 | 101893239 |
| CUX1 | chr7 | 101893183 | 101893437 |
| CUX1 | chr7 | 101916612 | 101916860 |
| CUX1 | chr7 | 101917490 | 101917744 |
| CUX1 | chr7 | 101918491 | 101918751 |

|              |       |           |           |
|--------------|-------|-----------|-----------|
| <i>CUX1</i>  | chr7  | 101921193 | 101921444 |
| <i>CUX1</i>  | chr7  | 101923298 | 101923529 |
| <i>CUX1</i>  | chr7  | 101924065 | 101924332 |
| <i>CUX1</i>  | chr7  | 101925109 | 101925334 |
| <i>DDX41</i> | chr5  | 176938453 | 176938680 |
| <i>DDX41</i> | chr5  | 176938599 | 176938823 |
| <i>DDX41</i> | chr5  | 176938759 | 176938987 |
| <i>DDX41</i> | chr5  | 176938939 | 176939163 |
| <i>DDX41</i> | chr5  | 176939113 | 176939346 |
| <i>DDX41</i> | chr5  | 176939297 | 176939537 |
| <i>DDX41</i> | chr5  | 176939483 | 176939710 |
| <i>DDX41</i> | chr5  | 176939661 | 176939891 |
| <i>DDX41</i> | chr5  | 176939837 | 176940061 |
| <i>DDX41</i> | chr5  | 176940015 | 176940239 |
| <i>DDX41</i> | chr5  | 176940181 | 176940420 |
| <i>DDX41</i> | chr5  | 176940365 | 176940589 |
| <i>DDX41</i> | chr5  | 176940537 | 176940766 |
| <i>DDX41</i> | chr5  | 176940715 | 176940987 |
| <i>DDX41</i> | chr5  | 176941581 | 176941811 |
| <i>DDX41</i> | chr5  | 176941737 | 176941961 |
| <i>DDX41</i> | chr5  | 176941911 | 176942147 |
| <i>DDX41</i> | chr5  | 176942097 | 176942355 |
| <i>DDX54</i> | chr12 | 113594875 | 113595099 |
| <i>DDX54</i> | chr12 | 113595023 | 113595250 |
| <i>DDX54</i> | chr12 | 113595191 | 113595423 |
| <i>DDX54</i> | chr12 | 113595375 | 113595613 |
| <i>DDX54</i> | chr12 | 113595563 | 113595818 |
| <i>DDX54</i> | chr12 | 113595753 | 113596003 |
| <i>DDX54</i> | chr12 | 113595955 | 113596196 |
| <i>DDX54</i> | chr12 | 113596143 | 113596370 |
| <i>DDX54</i> | chr12 | 113596319 | 113596552 |
| <i>DDX54</i> | chr12 | 113596501 | 113596749 |
| <i>DDX54</i> | chr12 | 113596699 | 113596957 |
| <i>DDX54</i> | chr12 | 113599048 | 113599277 |
| <i>DDX54</i> | chr12 | 113607546 | 113607770 |
| <i>DDX54</i> | chr12 | 113610131 | 113610405 |
| <i>DDX54</i> | chr12 | 113612322 | 113612546 |
| <i>DDX54</i> | chr12 | 113612490 | 113612721 |
| <i>DDX54</i> | chr12 | 113612668 | 113612909 |
| <i>DDX54</i> | chr12 | 113612860 | 113613118 |
| <i>DDX54</i> | chr12 | 113614522 | 113614746 |
| <i>DDX54</i> | chr12 | 113614696 | 113614937 |
| <i>DDX54</i> | chr12 | 113616657 | 113616882 |
| <i>DDX54</i> | chr12 | 113616821 | 113617064 |



|              |       |           |           |
|--------------|-------|-----------|-----------|
| <i>DDX54</i> | chr12 | 113617017 | 113617258 |
| <i>DDX54</i> | chr12 | 113617709 | 113617961 |
| <i>DDX54</i> | chr12 | 113618705 | 113618959 |
| <i>DDX54</i> | chr12 | 113622962 | 113623213 |
| <i>DDX54</i> | chr12 | 113623164 | 113623407 |
| <i>DHX29</i> | chr5  | 54551976  | 54552248  |
| <i>DHX29</i> | chr5  | 54552190  | 54552447  |
| <i>DHX29</i> | chr5  | 54555645  | 54555879  |
| <i>DHX29</i> | chr5  | 54557137  | 54557404  |
| <i>DHX29</i> | chr5  | 54558339  | 54558564  |
| <i>DHX29</i> | chr5  | 54558497  | 54558728  |
| <i>DHX29</i> | chr5  | 54558677  | 54558907  |
| <i>DHX29</i> | chr5  | 54562935  | 54563203  |
| <i>DHX29</i> | chr5  | 54563483  | 54563748  |
| <i>DHX29</i> | chr5  | 54565162  | 54565395  |
| <i>DHX29</i> | chr5  | 54565340  | 54565578  |
| <i>DHX29</i> | chr5  | 54566147  | 54566401  |
| <i>DHX29</i> | chr5  | 54566345  | 54566601  |
| <i>DHX29</i> | chr5  | 54567876  | 54568140  |
| <i>DHX29</i> | chr5  | 54569086  | 54569357  |
| <i>DHX29</i> | chr5  | 54570315  | 54570539  |
| <i>DHX29</i> | chr5  | 54570465  | 54570714  |
| <i>DHX29</i> | chr5  | 54570657  | 54570931  |
| <i>DHX29</i> | chr5  | 54572047  | 54572315  |
| <i>DHX29</i> | chr5  | 54572809  | 54573038  |
| <i>DHX29</i> | chr5  | 54572981  | 54573241  |
| <i>DHX29</i> | chr5  | 54578902  | 54579127  |
| <i>DHX29</i> | chr5  | 54579062  | 54579295  |
| <i>DHX29</i> | chr5  | 54579234  | 54579462  |
| <i>DHX29</i> | chr5  | 54579404  | 54579646  |
| <i>DHX29</i> | chr5  | 54579594  | 54579823  |
| <i>DHX29</i> | chr5  | 54581090  | 54581332  |
| <i>DHX29</i> | chr5  | 54581481  | 54581751  |
| <i>DHX29</i> | chr5  | 54584979  | 54585216  |
| <i>DHX29</i> | chr5  | 54585161  | 54585415  |
| <i>DHX29</i> | chr5  | 54585989  | 54586262  |
| <i>DHX29</i> | chr5  | 54589814  | 54590074  |
| <i>DHX29</i> | chr5  | 54591158  | 54591390  |
| <i>DHX29</i> | chr5  | 54592003  | 54592235  |
| <i>DHX29</i> | chr5  | 54593082  | 54593322  |
| <i>DHX29</i> | chr5  | 54603090  | 54603316  |
| <i>DHX29</i> | chr5  | 54603246  | 54603481  |
| <i>DHX29</i> | chr5  | 54603434  | 54603682  |
| <i>DHX29</i> | chr1  | 189960260 | 189960492 |

|               |       |          |          |
|---------------|-------|----------|----------|
| <i>DNMT3A</i> | chr2  | 25455720 | 25455945 |
| <i>DNMT3A</i> | chr2  | 25455862 | 25456089 |
| <i>DNMT3A</i> | chr2  | 25456020 | 25456248 |
| <i>DNMT3A</i> | chr2  | 25456194 | 25456418 |
| <i>DNMT3A</i> | chr2  | 25456360 | 25456587 |
| <i>DNMT3A</i> | chr2  | 25456536 | 25456785 |
| <i>DNMT3A</i> | chr2  | 25456720 | 25456949 |
| <i>DNMT3A</i> | chr2  | 25456882 | 25457123 |
| <i>DNMT3A</i> | chr2  | 25457064 | 25457315 |
| <i>DNMT3A</i> | chr2  | 25458543 | 25458771 |
| <i>DNMT3A</i> | chr2  | 25459778 | 25460034 |
| <i>DNMT3A</i> | chr2  | 25461954 | 25462186 |
| <i>DNMT3A</i> | chr2  | 25463044 | 25463269 |
| <i>DNMT3A</i> | chr2  | 25463216 | 25463447 |
| <i>DNMT3A</i> | chr2  | 25463396 | 25463668 |
| <i>DNMT3A</i> | chr2  | 25464402 | 25464667 |
| <i>DNMT3A</i> | chr2  | 25466638 | 25466862 |
| <i>DNMT3A</i> | chr2  | 25466968 | 25467231 |
| <i>DNMT3A</i> | chr2  | 25467186 | 25467411 |
| <i>DNMT3A</i> | chr2  | 25467364 | 25467638 |
| <i>DNMT3A</i> | chr2  | 25468095 | 25468367 |
| <i>DNMT3A</i> | chr2  | 25468768 | 25468993 |
| <i>DNMT3A</i> | chr2  | 25468948 | 25469182 |
| <i>DNMT3A</i> | chr2  | 25469540 | 25469773 |
| <i>DNMT3A</i> | chr2  | 25469726 | 25469970 |
| <i>DNMT3A</i> | chr2  | 25469922 | 25470183 |
| <i>DNMT3A</i> | chr2  | 25470433 | 25470661 |
| <i>DNMT3A</i> | chr2  | 25470783 | 25471057 |
| <i>DNMT3A</i> | chr2  | 25471007 | 25471261 |
| <i>DNMT3A</i> | chr2  | 25472499 | 25472739 |
| <i>DNMT3A</i> | chr2  | 25497783 | 25498036 |
| <i>DNMT3A</i> | chr2  | 25498336 | 25498562 |
| <i>DNMT3A</i> | chr2  | 25504196 | 25504423 |
| <i>DNMT3A</i> | chr2  | 25504364 | 25504589 |
| <i>DNMT3A</i> | chr2  | 25504532 | 25504773 |
| <i>DNMT3A</i> | chr2  | 25504896 | 25505158 |
| <i>DNMT3A</i> | chr2  | 25505102 | 25505326 |
| <i>DNMT3A</i> | chr2  | 25505272 | 25505516 |
| <i>DNMT3A</i> | chr2  | 25505466 | 25505738 |
| <i>DNMT3A</i> | chr2  | 25522983 | 25523256 |
| <i>DNMT3A</i> | chr2  | 25536677 | 25536951 |
| <i>DNMT3A</i> | chr2  | 25536901 | 25537158 |
| <i>EED</i>    | chr11 | 85955690 | 85955915 |
| <i>EED</i>    | chr11 | 85956034 | 85956281 |

|              |       |           |           |
|--------------|-------|-----------|-----------|
| <i>EED</i>   | chr11 | 85956234  | 85956507  |
| <i>EED</i>   | chr11 | 85961307  | 85961581  |
| <i>EED</i>   | chr11 | 85963131  | 85963401  |
| <i>EED</i>   | chr11 | 85966207  | 85966473  |
| <i>EED</i>   | chr11 | 85967396  | 85967622  |
| <i>EED</i>   | chr11 | 85968514  | 85968738  |
| <i>EED</i>   | chr11 | 85975181  | 85975411  |
| <i>EED</i>   | chr11 | 85977060  | 85977288  |
| <i>EED</i>   | chr11 | 85979467  | 85979709  |
| <i>EED</i>   | chr11 | 85987991  | 85988265  |
| <i>EED</i>   | chr11 | 85988833  | 85989057  |
| <i>EED</i>   | chr11 | 85988991  | 85989216  |
| <i>EED</i>   | chr11 | 85989133  | 85989359  |
| <i>EED</i>   | chr11 | 85989305  | 85989551  |
| <i>EED</i>   | chr11 | 85989501  | 85989735  |
| <i>EED</i>   | chr11 | 85989679  | 85989943  |
| <i>EED</i>   | chrX  | 139480427 | 139480657 |
| <i>ERBB4</i> | chr2  | 212251830 | 212252054 |
| <i>ERBB4</i> | chr2  | 212566727 | 212566957 |
| <i>ETV6</i>  | chr12 | 11802697  | 11802971  |
| <i>ETV6</i>  | chr12 | 11802917  | 11803190  |
| <i>ETV6</i>  | chr12 | 11905355  | 11905626  |
| <i>ETV6</i>  | chr12 | 11992047  | 11992299  |
| <i>ETV6</i>  | chr12 | 12006332  | 12006588  |
| <i>ETV6</i>  | chr12 | 12022233  | 12022461  |
| <i>ETV6</i>  | chr12 | 12022405  | 12022632  |
| <i>ETV6</i>  | chr12 | 12022581  | 12022818  |
| <i>ETV6</i>  | chr12 | 12022765  | 12023022  |
| <i>ETV6</i>  | chr12 | 12037352  | 12037609  |
| <i>ETV6</i>  | chr12 | 12038831  | 12039063  |
| <i>ETV6</i>  | chr12 | 12043748  | 12043972  |
| <i>ETV6</i>  | chr12 | 12043890  | 12044115  |
| <i>ETV6</i>  | chr12 | 12044038  | 12044262  |
| <i>ETV6</i>  | chr12 | 12044200  | 12044430  |
| <i>ETV6</i>  | chr12 | 12044352  | 12044582  |
| <i>ETV6</i>  | chr12 | 12044498  | 12044722  |
| <i>ETV6</i>  | chr12 | 12044658  | 12044889  |
| <i>ETV6</i>  | chr12 | 12044836  | 12045062  |
| <i>ETV6</i>  | chr12 | 12045006  | 12045234  |
| <i>ETV6</i>  | chr12 | 12045182  | 12045406  |
| <i>ETV6</i>  | chr12 | 12045322  | 12045546  |
| <i>ETV6</i>  | chr12 | 12045460  | 12045687  |
| <i>ETV6</i>  | chr12 | 12045622  | 12045846  |
| <i>ETV6</i>  | chr12 | 12045796  | 12046021  |

|              |       |           |           |
|--------------|-------|-----------|-----------|
| <i>ETV6</i>  | chr12 | 12045972  | 12046198  |
| <i>ETV6</i>  | chr12 | 12046292  | 12046527  |
| <i>ETV6</i>  | chr12 | 12046472  | 12046697  |
| <i>ETV6</i>  | chr12 | 12046820  | 12047044  |
| <i>ETV6</i>  | chr12 | 12046958  | 12047184  |
| <i>ETV6</i>  | chr12 | 12047110  | 12047337  |
| <i>ETV6</i>  | chr12 | 12047280  | 12047505  |
| <i>ETV6</i>  | chr12 | 12047442  | 12047672  |
| <i>ETV6</i>  | chr12 | 12047618  | 12047846  |
| <i>ETV6</i>  | chr12 | 12047792  | 12048027  |
| <i>ETV6</i>  | chr12 | 12047970  | 12048195  |
| <i>ETV6</i>  | chr12 | 12048140  | 12048407  |
| <i>EZH2</i>  | chr21 | 36972016  | 36972511  |
| <i>EZH2</i>  | chr7  | 148504346 | 148504573 |
| <i>EZH2</i>  | chr7  | 148504508 | 148504777 |
| <i>EZH2</i>  | chr7  | 148504724 | 148504958 |
| <i>EZH2</i>  | chr7  | 148506038 | 148506263 |
| <i>EZH2</i>  | chr7  | 148506206 | 148506438 |
| <i>EZH2</i>  | chr7  | 148506382 | 148506640 |
| <i>EZH2</i>  | chr7  | 148507398 | 148507652 |
| <i>EZH2</i>  | chr7  | 148508688 | 148508946 |
| <i>EZH2</i>  | chr7  | 148511022 | 148511284 |
| <i>EZH2</i>  | chr7  | 148511975 | 148512227 |
| <i>EZH2</i>  | chr7  | 148512567 | 148512807 |
| <i>EZH2</i>  | chr7  | 148513749 | 148514004 |
| <i>EZH2</i>  | chr7  | 148514279 | 148514523 |
| <i>EZH2</i>  | chr7  | 148523465 | 148523694 |
| <i>EZH2</i>  | chr7  | 148523641 | 148523900 |
| <i>EZH2</i>  | chr7  | 148524225 | 148524454 |
| <i>EZH2</i>  | chr7  | 148525801 | 148526075 |
| <i>EZH2</i>  | chr7  | 148526791 | 148527051 |
| <i>EZH2</i>  | chr7  | 148529643 | 148529905 |
| <i>EZH2</i>  | chr7  | 148543517 | 148543787 |
| <i>EZH2</i>  | chr7  | 148544199 | 148544457 |
| <i>EZH2</i>  | chr7  | 148581205 | 148581447 |
| <i>FLT3</i>  | chr13 | 28592608  | 28592848  |
| <i>FLT3</i>  | chr13 | 28602313  | 28602563  |
| <i>FLT3</i>  | chr13 | 28607985  | 28608214  |
| <i>FLT3</i>  | chr13 | 28608159  | 28608409  |
| <i>GATA2</i> | chr3  | 128198380 | 128198604 |
| <i>GATA2</i> | chr3  | 128198544 | 128198776 |
| <i>GATA2</i> | chr3  | 128198726 | 128198988 |
| <i>GATA2</i> | chr3  | 128198918 | 128199145 |
| <i>GATA2</i> | chr3  | 128199098 | 128199339 |

|              |       |           |           |
|--------------|-------|-----------|-----------|
| <i>GATA2</i> | chr3  | 128199286 | 128199517 |
| <i>GATA2</i> | chr3  | 128199464 | 128199709 |
| <i>GATA2</i> | chr3  | 128199818 | 128200058 |
| <i>GATA2</i> | chr3  | 128200617 | 128200887 |
| <i>GATA2</i> | chr3  | 128202676 | 128202922 |
| <i>GATA2</i> | chr3  | 128204445 | 128204674 |
| <i>GATA2</i> | chr3  | 128204625 | 128204867 |
| <i>GATA2</i> | chr3  | 128204809 | 128205066 |
| <i>GATA2</i> | chr3  | 128205017 | 128205273 |
| <i>GATA2</i> | chr3  | 128205701 | 128205931 |
| <i>GATA2</i> | chr3  | 128206527 | 128206800 |
| <i>GATA2</i> | chr3  | 128207168 | 128207402 |
| <i>GATA2</i> | chr3  | 128211621 | 128211895 |
| <i>GATA2</i> | chr3  | 128211837 | 128212087 |
| <i>GNB1</i>  | chr1  | 1737867   | 1738103   |
| <i>GNB1</i>  | chr1  | 1747200   | 1747460   |
| <i>IDH1</i>  | chr2  | 209113084 | 209113332 |
| <i>IDH2</i>  | chr15 | 90631901  | 90632143  |
| <i>IRF4</i>  | chr6  | 391710    | 391970    |
| <i>IRF4</i>  | chr6  | 392979    | 393223    |
| <i>IRF4</i>  | chr6  | 393173    | 393421    |
| <i>IRF4</i>  | chr6  | 394792    | 395046    |
| <i>IRF4</i>  | chr6  | 395818    | 396066    |
| <i>IRF4</i>  | chr6  | 397079    | 397352    |
| <i>IRF4</i>  | chr6  | 398797    | 399033    |
| <i>IRF4</i>  | chr6  | 401301    | 401526    |
| <i>IRF4</i>  | chr6  | 401473    | 401712    |
| <i>IRF4</i>  | chr6  | 401663    | 401918    |
| <i>IRF4</i>  | chr6  | 404991    | 405253    |
| <i>IRF4</i>  | chr6  | 407328    | 407552    |
| <i>IRF4</i>  | chr6  | 407644    | 407868    |
| <i>IRF4</i>  | chr6  | 407790    | 408017    |
| <i>IRF4</i>  | chr6  | 407934    | 408158    |
| <i>IRF4</i>  | chr6  | 408076    | 408302    |
| <i>IRF4</i>  | chr6  | 408232    | 408457    |
| <i>IRF4</i>  | chr6  | 408370    | 408594    |
| <i>IRF4</i>  | chr6  | 408516    | 408742    |
| <i>IRF4</i>  | chr6  | 408670    | 408895    |
| <i>IRF4</i>  | chr6  | 408818    | 409043    |
| <i>IRF4</i>  | chr6  | 408974    | 409205    |
| <i>IRF4</i>  | chr6  | 409150    | 409375    |
| <i>IRF4</i>  | chr6  | 409292    | 409516    |
| <i>IRF4</i>  | chr6  | 409438    | 409662    |
| <i>IRF4</i>  | chr6  | 409578    | 409802    |

|              |      |          |          |
|--------------|------|----------|----------|
| <i>IRF4</i>  | chr6 | 409726   | 409951   |
| <i>IRF4</i>  | chr6 | 409890   | 410114   |
| <i>IRF4</i>  | chr6 | 410058   | 410301   |
| <i>IRF4</i>  | chr6 | 410242   | 410466   |
| <i>IRF4</i>  | chr6 | 410410   | 410635   |
| <i>IRF4</i>  | chr6 | 410580   | 410804   |
| <i>IRF4</i>  | chr6 | 410746   | 410971   |
| <i>IRF4</i>  | chr6 | 410918   | 411150   |
| <i>IRF4</i>  | chr6 | 411096   | 411322   |
| <i>IRF4</i>  | chr6 | 411270   | 411512   |
| <i>JAK2</i>  | chr9 | 5069996  | 5070224  |
| <i>JAK2</i>  | chr9 | 5073738  | 5074010  |
| <i>KDM6A</i> | chrY | 15447784 | 15448008 |
| <i>KDM6A</i> | chrX | 44732302 | 44732536 |
| <i>KDM6A</i> | chrX | 44732486 | 44732727 |
| <i>KDM6A</i> | chrX | 44732668 | 44732901 |
| <i>KDM6A</i> | chrX | 44732850 | 44733087 |
| <i>KDM6A</i> | chrX | 44820468 | 44820742 |
| <i>KDM6A</i> | chrX | 44833862 | 44834104 |
| <i>KDM6A</i> | chrX | 44870175 | 44870448 |
| <i>KDM6A</i> | chrX | 44879810 | 44880083 |
| <i>KDM6A</i> | chrX | 44894147 | 44894385 |
| <i>KDM6A</i> | chrX | 44896847 | 44897101 |
| <i>KDM6A</i> | chrX | 44910923 | 44911197 |
| <i>KDM6A</i> | chrX | 44913003 | 44913227 |
| <i>KDM6A</i> | chrX | 44918150 | 44918407 |
| <i>KDM6A</i> | chrX | 44918334 | 44918562 |
| <i>KDM6A</i> | chrX | 44918508 | 44918772 |
| <i>KDM6A</i> | chrX | 44919228 | 44919494 |
| <i>KDM6A</i> | chrX | 44920500 | 44920728 |
| <i>KDM6A</i> | chrX | 44921821 | 44922073 |
| <i>KDM6A</i> | chrX | 44922538 | 44922764 |
| <i>KDM6A</i> | chrX | 44922714 | 44922941 |
| <i>KDM6A</i> | chrX | 44922884 | 44923147 |
| <i>KDM6A</i> | chrX | 44928697 | 44928922 |
| <i>KDM6A</i> | chrX | 44928851 | 44929084 |
| <i>KDM6A</i> | chrX | 44929031 | 44929261 |
| <i>KDM6A</i> | chrX | 44929207 | 44929443 |
| <i>KDM6A</i> | chrX | 44929391 | 44929649 |
| <i>KDM6A</i> | chrX | 44935895 | 44936129 |
| <i>KDM6A</i> | chrX | 44937606 | 44937833 |
| <i>KDM6A</i> | chrX | 44938266 | 44938497 |
| <i>KDM6A</i> | chrX | 44938448 | 44938676 |
| <i>KDM6A</i> | chrX | 44941692 | 44941929 |

|               |       |           |           |
|---------------|-------|-----------|-----------|
| <i>KDM6A</i>  | chrX  | 44941870  | 44942125  |
| <i>KDM6A</i>  | chrX  | 44942674  | 44942932  |
| <i>KDM6A</i>  | chrX  | 44945069  | 44945323  |
| <i>KDM6A</i>  | chrX  | 44948859  | 44949090  |
| <i>KDM6A</i>  | chrX  | 44949035  | 44949297  |
| <i>KDM6A</i>  | chrX  | 44949929  | 44950201  |
| <i>KDM6A</i>  | chrX  | 44966624  | 44966848  |
| <i>KDM6A</i>  | chrX  | 44969285  | 44969533  |
| <i>KIT</i>    | chr4  | 55589743  | 55590010  |
| <i>KIT</i>    | chr4  | 55592111  | 55592355  |
| <i>KIT</i>    | chr4  | 55593315  | 55593574  |
| <i>KIT</i>    | chr4  | 55593517  | 55593777  |
| <i>KIT</i>    | chr4  | 55599303  | 55599546  |
| <i>KRAS</i>   | chr12 | 25380246  | 25380480  |
| <i>KRAS</i>   | chr12 | 25398252  | 25398518  |
| <i>LUC7L2</i> | chr7  | 139044521 | 139044746 |
| <i>LUC7L2</i> | chr7  | 139044699 | 139044946 |
| <i>LUC7L2</i> | chr7  | 139044901 | 139045130 |
| <i>LUC7L2</i> | chr7  | 139060769 | 139061023 |
| <i>LUC7L2</i> | chr7  | 139083272 | 139083506 |
| <i>LUC7L2</i> | chr7  | 139086842 | 139087104 |
| <i>LUC7L2</i> | chr7  | 139090345 | 139090575 |
| <i>LUC7L2</i> | chr7  | 139091889 | 139092157 |
| <i>LUC7L2</i> | chr7  | 139094266 | 139094508 |
| <i>LUC7L2</i> | chr7  | 139097238 | 139097492 |
| <i>LUC7L2</i> | chr7  | 139102155 | 139102384 |
| <i>LUC7L2</i> | chr7  | 139102333 | 139102602 |
| <i>LUC7L2</i> | chr7  | 139106782 | 139107006 |
| <i>LUC7L2</i> | chr7  | 139106946 | 139107170 |
| <i>LUC7L2</i> | chr7  | 139107120 | 139107349 |
| <i>LUC7L2</i> | chr7  | 139107286 | 139107516 |
| <i>LUC7L2</i> | chr7  | 139107456 | 139107700 |
| <i>LUC7L2</i> | chr7  | 139107644 | 139107903 |
| <i>LUC7L2</i> | chr7  | 139107824 | 139108054 |
| <i>LUC7L2</i> | chr7  | 139108000 | 139108254 |
| <i>MECOM</i>  | chr3  | 168801160 | 168801385 |
| <i>MECOM</i>  | chr3  | 168801318 | 168801561 |
| <i>MECOM</i>  | chr3  | 168801496 | 168801724 |
| <i>MECOM</i>  | chr3  | 168801660 | 168801895 |
| <i>MECOM</i>  | chr3  | 168801836 | 168802066 |
| <i>MECOM</i>  | chr3  | 168802012 | 168802281 |
| <i>MECOM</i>  | chr3  | 168802200 | 168802429 |
| <i>MECOM</i>  | chr3  | 168802380 | 168802610 |
| <i>MECOM</i>  | chr3  | 168802554 | 168802797 |

|              |       |           |           |
|--------------|-------|-----------|-----------|
| <i>MECOM</i> | chr3  | 168802748 | 168803005 |
| <i>MECOM</i> | chr3  | 168806663 | 168806896 |
| <i>MECOM</i> | chr3  | 168806839 | 168807101 |
| <i>MECOM</i> | chr3  | 168807687 | 168807922 |
| <i>MECOM</i> | chr3  | 168807867 | 168808113 |
| <i>MECOM</i> | chr3  | 168810705 | 168810961 |
| <i>MECOM</i> | chr3  | 168812825 | 168813071 |
| <i>MECOM</i> | chr3  | 168818552 | 168818820 |
| <i>MECOM</i> | chr3  | 168819819 | 168820045 |
| <i>MECOM</i> | chr3  | 168825673 | 168825940 |
| <i>MECOM</i> | chr3  | 168830544 | 168830818 |
| <i>MECOM</i> | chr3  | 168833074 | 168833305 |
| <i>MECOM</i> | chr3  | 168833260 | 168833499 |
| <i>MECOM</i> | chr3  | 168833446 | 168833674 |
| <i>MECOM</i> | chr3  | 168833614 | 168833857 |
| <i>MECOM</i> | chr3  | 168833784 | 168834013 |
| <i>MECOM</i> | chr3  | 168833962 | 168834196 |
| <i>MECOM</i> | chr3  | 168834140 | 168834397 |
| <i>MECOM</i> | chr3  | 168834350 | 168834587 |
| <i>MECOM</i> | chr3  | 168838817 | 168839073 |
| <i>MECOM</i> | chr3  | 168840339 | 168840569 |
| <i>MECOM</i> | chr3  | 168845509 | 168845738 |
| <i>MECOM</i> | chr3  | 168845683 | 168845926 |
| <i>MECOM</i> | chr3  | 168849188 | 168849430 |
| <i>MECOM</i> | chr3  | 168861455 | 168861685 |
| <i>MECOM</i> | chr3  | 168862754 | 168863028 |
| <i>MECOM</i> | chr3  | 168863887 | 168864112 |
| <i>MECOM</i> | chr3  | 168864039 | 168864263 |
| <i>MECOM</i> | chr3  | 168864195 | 168864430 |
| <i>MECOM</i> | chr3  | 168864383 | 168864622 |
| <i>MECOM</i> | chr3  | 168864565 | 168864797 |
| <i>MECOM</i> | chr3  | 168864745 | 168864982 |
| <i>MECOM</i> | chr3  | 168865109 | 168865336 |
| <i>MECOM</i> | chr3  | 168865277 | 168865501 |
| <i>MECOM</i> | chr3  | 168865451 | 168865710 |
| <i>MECOM</i> | chr3  | 169098856 | 169099083 |
| <i>MECOM</i> | chr3  | 169099030 | 169099260 |
| <i>MECOM</i> | chr3  | 169099212 | 169099450 |
| <i>MECOM</i> | chr3  | 169381019 | 169381244 |
| <i>MECOM</i> | chr3  | 169381353 | 169381588 |
| <i>MPL</i>   | chr1  | 43814903  | 43815132  |
| <i>NF1</i>   | chr18 | 14156078  | 14156337  |
| <i>NF1</i>   | chr18 | 14156283  | 14156508  |
| <i>NF1</i>   | chr18 | 14156420  | 14156679  |



|     |       |          |          |
|-----|-------|----------|----------|
| NF1 | chr18 | 14157032 | 14157274 |
| NF1 | chr18 | 14157221 | 14157454 |
| NF1 | chr21 | 15373135 | 15373368 |
| NF1 | chr21 | 15373315 | 15373557 |
| NF1 | chr21 | 15374079 | 15374304 |
| NF1 | chr21 | 15374250 | 15374508 |
| NF1 | chr22 | 16345883 | 16346115 |
| NF1 | chr22 | 16346397 | 16346664 |
| NF1 | chr22 | 16351949 | 16352172 |
| NF1 | chr22 | 16352294 | 16352544 |
| NF1 | chr14 | 19488785 | 19489036 |
| NF1 | chr14 | 19489158 | 19489381 |
| NF1 | chr14 | 19490983 | 19491213 |
| NF1 | chr14 | 19494676 | 19494943 |
| NF1 | chr14 | 19495225 | 19495457 |
| NF1 | chr14 | 20078002 | 20078234 |
| NF1 | chr14 | 20078516 | 20078783 |
| NF1 | chr14 | 20082244 | 20082474 |
| NF1 | chr14 | 20084076 | 20084299 |
| NF1 | chr14 | 20084421 | 20084672 |
| NF1 | chr14 | 20084954 | 20085207 |
| NF1 | chr15 | 21125683 | 21125937 |
| NF1 | chr15 | 21134282 | 21134502 |
| NF1 | chr15 | 21134443 | 21134668 |
| NF1 | chr15 | 21134609 | 21134834 |
| NF1 | chr15 | 21136431 | 21136674 |
| NF1 | chr15 | 21137026 | 21137284 |
| NF1 | chr15 | 21137436 | 21137694 |
| NF1 | chr15 | 21138153 | 21138385 |
| NF1 | chr15 | 21138329 | 21138552 |
| NF1 | chr15 | 21140130 | 21140360 |
| NF1 | chr15 | 21140655 | 21140914 |
| NF1 | chr15 | 22136864 | 22137118 |
| NF1 | chr15 | 22145459 | 22145679 |
| NF1 | chr15 | 22145620 | 22145845 |
| NF1 | chr15 | 22145786 | 22146011 |
| NF1 | chr15 | 22147608 | 22147851 |
| NF1 | chr15 | 22148612 | 22148870 |
| NF1 | chr15 | 22149329 | 22149561 |
| NF1 | chr15 | 22149505 | 22149728 |
| NF1 | chr15 | 22151308 | 22151538 |
| NF1 | chr15 | 22151833 | 22152092 |
| NF1 | chr17 | 29421822 | 29422047 |
| NF1 | chr17 | 29421990 | 29422226 |

|     |       |          |          |
|-----|-------|----------|----------|
| NF1 | chr17 | 29422176 | 29422443 |
| NF1 | chr17 | 29482954 | 29483180 |
| NF1 | chr17 | 29485983 | 29486227 |
| NF1 | chr17 | 29490077 | 29490305 |
| NF1 | chr17 | 29490255 | 29490528 |
| NF1 | chr17 | 29496856 | 29497120 |
| NF1 | chr17 | 29508313 | 29508562 |
| NF1 | chr17 | 29508493 | 29508746 |
| NF1 | chr17 | 29508691 | 29508945 |
| NF1 | chr17 | 29509409 | 29509643 |
| NF1 | chr17 | 29509589 | 29509847 |
| NF1 | chr17 | 29527327 | 29527560 |
| NF1 | chr17 | 29527507 | 29527749 |
| NF1 | chr17 | 29527930 | 29528159 |
| NF1 | chr17 | 29528102 | 29528363 |
| NF1 | chr17 | 29528274 | 29528502 |
| NF1 | chr17 | 29528448 | 29528706 |
| NF1 | chr17 | 29533227 | 29533473 |
| NF1 | chr17 | 29541438 | 29541670 |
| NF1 | chr17 | 29545958 | 29546228 |
| NF1 | chr17 | 29550431 | 29550697 |
| NF1 | chr17 | 29552072 | 29552330 |
| NF1 | chr17 | 29553552 | 29553813 |
| NF1 | chr17 | 29554107 | 29554335 |
| NF1 | chr17 | 29554285 | 29554519 |
| NF1 | chr17 | 29554463 | 29554721 |
| NF1 | chr17 | 29555940 | 29556164 |
| NF1 | chr17 | 29556108 | 29556340 |
| NF1 | chr17 | 29556286 | 29556532 |
| NF1 | chr17 | 29556810 | 29557066 |
| NF1 | chr17 | 29557223 | 29557481 |
| NF1 | chr17 | 29557829 | 29558071 |
| NF1 | chr17 | 29559036 | 29559310 |
| NF1 | chr17 | 29559591 | 29559816 |
| NF1 | chr17 | 29559757 | 29559982 |
| NF1 | chr17 | 29559923 | 29560147 |
| NF1 | chr17 | 29560093 | 29560355 |
| NF1 | chr17 | 29562500 | 29562730 |
| NF1 | chr17 | 29562674 | 29562917 |
| NF1 | chr17 | 29562862 | 29563129 |
| NF1 | chr17 | 29575873 | 29576126 |
| NF1 | chr17 | 29576073 | 29576337 |
| NF1 | chr17 | 29579927 | 29580167 |
| NF1 | chr17 | 29585331 | 29585565 |

|     |       |          |          |
|-----|-------|----------|----------|
| NF1 | chr17 | 29587356 | 29587625 |
| NF1 | chr17 | 29588676 | 29588934 |
| NF1 | chr17 | 29592214 | 29592446 |
| NF1 | chr17 | 29652773 | 29653004 |
| NF1 | chr17 | 29652947 | 29653187 |
| NF1 | chr17 | 29653133 | 29653392 |
| NF1 | chr17 | 29654390 | 29654614 |
| NF1 | chr17 | 29654552 | 29654792 |
| NF1 | chr17 | 29654740 | 29655001 |
| NF1 | chr17 | 29657205 | 29657439 |
| NF1 | chr17 | 29657383 | 29657611 |
| NF1 | chr17 | 29661729 | 29661955 |
| NF1 | chr17 | 29661901 | 29662146 |
| NF1 | chr17 | 29663224 | 29663457 |
| NF1 | chr17 | 29663396 | 29663660 |
| NF1 | chr17 | 29663588 | 29663819 |
| NF1 | chr17 | 29663768 | 29664039 |
| NF1 | chr17 | 29664301 | 29664526 |
| NF1 | chr17 | 29664481 | 29664751 |
| NF1 | chr17 | 29664677 | 29664901 |
| NF1 | chr17 | 29664831 | 29665063 |
| NF1 | chr17 | 29665005 | 29665257 |
| NF1 | chr17 | 29665651 | 29665885 |
| NF1 | chr17 | 29667494 | 29667732 |
| NF1 | chr17 | 29669994 | 29670266 |
| NF1 | chr17 | 29676067 | 29676327 |
| NF1 | chr17 | 29677174 | 29677431 |
| NF1 | chr17 | 29679150 | 29679385 |
| NF1 | chr17 | 29679340 | 29679575 |
| NF1 | chr17 | 29683437 | 29683661 |
| NF1 | chr17 | 29683873 | 29684100 |
| NF1 | chr17 | 29684043 | 29684299 |
| NF1 | chr17 | 29684243 | 29684499 |
| NF1 | chr17 | 29685449 | 29685719 |
| NF1 | chr17 | 29685948 | 29686215 |
| NF1 | chr17 | 29687596 | 29687857 |
| NF1 | chr17 | 29700906 | 29701130 |
| NF1 | chr17 | 29701050 | 29701275 |
| NF1 | chr17 | 29701192 | 29701416 |
| NF1 | chr17 | 29701336 | 29701560 |
| NF1 | chr17 | 29701504 | 29701728 |
| NF1 | chr17 | 29701676 | 29701918 |
| NF1 | chr17 | 29701860 | 29702126 |
| NF1 | chr17 | 29702068 | 29702341 |

|      |       |           |           |
|------|-------|-----------|-----------|
| NF1  | chr17 | 29702268  | 29702498  |
| NF1  | chr17 | 29702442  | 29702679  |
| NF1  | chr17 | 29702624  | 29702857  |
| NF1  | chr17 | 29702776  | 29703000  |
| NF1  | chr17 | 29702940  | 29703164  |
| NF1  | chr17 | 29703078  | 29703307  |
| NF1  | chr17 | 29703220  | 29703444  |
| NF1  | chr17 | 29703362  | 29703587  |
| NF1  | chr17 | 29703530  | 29703755  |
| NF1  | chr17 | 29703668  | 29703893  |
| NF1  | chr17 | 29703830  | 29704056  |
| NF1  | chr17 | 29704006  | 29704232  |
| NF1  | chr17 | 29704150  | 29704384  |
| NF1  | chr17 | 29704314  | 29704563  |
| NF1  | chr17 | 29704508  | 29704742  |
| NF1  | chr12 | 38599961  | 38600219  |
| NF1  | chr12 | 38600503  | 38600753  |
| NF1  | chr12 | 38600874  | 38601097  |
| NF1  | chr2  | 131947881 | 131948162 |
| NF1  | chr2  | 131948863 | 131949114 |
| NF1  | chr2  | 131949236 | 131949459 |
| NF1  | chr2  | 131951066 | 131951296 |
| NF1  | chr2  | 131951563 | 131951820 |
| NF1  | chr2  | 131953200 | 131953456 |
| NF1  | chr2  | 131954831 | 131955097 |
| NPM1 | chr2  | 4561631   | 4561900   |
| NPM1 | chr12 | 9848721   | 9848990   |
| NPM1 | chr7  | 11297147  | 11297414  |
| NPM1 | chr7  | 18988361  | 18988627  |
| NPM1 | chr10 | 21402325  | 21402593  |
| NPM1 | chr13 | 28270364  | 28270633  |
| NPM1 | chrX  | 32224750  | 32225018  |
| NPM1 | chr11 | 62099194  | 62099454  |
| NPM1 | chr8  | 62115680  | 62115949  |
| NPM1 | chr8  | 68098235  | 68098502  |
| NPM1 | chr13 | 68405846  | 68406114  |
| NPM1 | chr6  | 70415016  | 70415285  |
| NPM1 | chr15 | 73453952  | 73454220  |
| NPM1 | chr10 | 74677231  | 74677500  |
| NPM1 | chr11 | 74790139  | 74790408  |
| NPM1 | chr4  | 82931658  | 82931924  |
| NPM1 | chr15 | 92829804  | 92830308  |
| NPM1 | chr5  | 93018379  | 93018649  |
| NPM1 | chr10 | 97948954  | 97949221  |

|             |       |           |           |
|-------------|-------|-----------|-----------|
| <i>NPM1</i> | chr11 | 104552945 | 104553216 |
| <i>NPM1</i> | chrX  | 123415169 | 123415438 |
| <i>NPM1</i> | chr3  | 147308631 | 147308882 |
| <i>NPM1</i> | chr7  | 149031845 | 149032109 |
| <i>NPM1</i> | chr5  | 170834711 | 170834971 |
| <i>NPM1</i> | chr5  | 170837487 | 170837733 |
| <i>NPM1</i> | chr2  | 198244262 | 198244531 |
| <i>NPM1</i> | chr2  | 204637191 | 204637460 |
| <i>NRAS</i> | chr1  | 115258716 | 115258982 |
| <i>PHF6</i> | chrX  | 133507313 | 133507553 |
| <i>PHF6</i> | chrX  | 133511509 | 133511769 |
| <i>PHF6</i> | chrX  | 133511715 | 133511989 |
| <i>PHF6</i> | chrX  | 133511925 | 133512163 |
| <i>PHF6</i> | chrX  | 133527416 | 133527666 |
| <i>PHF6</i> | chrX  | 133527610 | 133527884 |
| <i>PHF6</i> | chrX  | 133527830 | 133528098 |
| <i>PHF6</i> | chrX  | 133547397 | 133547670 |
| <i>PHF6</i> | chrX  | 133547617 | 133547889 |
| <i>PHF6</i> | chrX  | 133547833 | 133548073 |
| <i>PHF6</i> | chrX  | 133548933 | 133549177 |
| <i>PHF6</i> | chrX  | 133549121 | 133549394 |
| <i>PHF6</i> | chrX  | 133551168 | 133551428 |
| <i>PHF6</i> | chrX  | 133559108 | 133559332 |
| <i>PHF6</i> | chrX  | 133559252 | 133559485 |
| <i>PHF6</i> | chrX  | 133559398 | 133559622 |
| <i>PHF6</i> | chrX  | 133559556 | 133559782 |
| <i>PHF6</i> | chrX  | 133559698 | 133559923 |
| <i>PHF6</i> | chrX  | 133559838 | 133560064 |
| <i>PHF6</i> | chrX  | 133559978 | 133560204 |
| <i>PHF6</i> | chrX  | 133560126 | 133560352 |
| <i>PHF6</i> | chrX  | 133560270 | 133560496 |
| <i>PHF6</i> | chrX  | 133560414 | 133560639 |
| <i>PHF6</i> | chrX  | 133560552 | 133560776 |
| <i>PHF6</i> | chrX  | 133560692 | 133560917 |
| <i>PHF6</i> | chrX  | 133560838 | 133561065 |
| <i>PHF6</i> | chrX  | 133561008 | 133561233 |
| <i>PHF6</i> | chrX  | 133561146 | 133561371 |
| <i>PHF6</i> | chrX  | 133561286 | 133561512 |
| <i>PHF6</i> | chrX  | 133561448 | 133561678 |
| <i>PHF6</i> | chrX  | 133561622 | 133561846 |
| <i>PHF6</i> | chrX  | 133561788 | 133562021 |
| <i>PHF6</i> | chrX  | 133561966 | 133562237 |
| <i>PHF6</i> | chrX  | 133562178 | 133562411 |
| <i>PHF6</i> | chrX  | 133562350 | 133562612 |

|              |       |           |           |
|--------------|-------|-----------|-----------|
| <i>PHF6</i>  | chrX  | 133562532 | 133562783 |
| <i>PHF6</i>  | chrX  | 133562724 | 133562990 |
| <i>PRPF8</i> | chr17 | 1553806   | 1554032   |
| <i>PRPF8</i> | chr17 | 1553958   | 1554227   |
| <i>PRPF8</i> | chr17 | 1554176   | 1554447   |
| <i>PRPF8</i> | chr17 | 1554400   | 1554626   |
| <i>PRPF8</i> | chr17 | 1554554   | 1554783   |
| <i>PRPF8</i> | chr17 | 1554734   | 1554964   |
| <i>PRPF8</i> | chr17 | 1554916   | 1555156   |
| <i>PRPF8</i> | chr17 | 1556707   | 1556940   |
| <i>PRPF8</i> | chr17 | 1556863   | 1557094   |
| <i>PRPF8</i> | chr17 | 1557045   | 1557288   |
| <i>PRPF8</i> | chr17 | 1557235   | 1557495   |
| <i>PRPF8</i> | chr17 | 1558617   | 1558869   |
| <i>PRPF8</i> | chr17 | 1559561   | 1559790   |
| <i>PRPF8</i> | chr17 | 1559737   | 1559966   |
| <i>PRPF8</i> | chr17 | 1559921   | 1560183   |
| <i>PRPF8</i> | chr17 | 1561422   | 1561651   |
| <i>PRPF8</i> | chr17 | 1561818   | 1562048   |
| <i>PRPF8</i> | chr17 | 1561996   | 1562233   |
| <i>PRPF8</i> | chr17 | 1562622   | 1562872   |
| <i>PRPF8</i> | chr17 | 1563108   | 1563338   |
| <i>PRPF8</i> | chr17 | 1563601   | 1563827   |
| <i>PRPF8</i> | chr17 | 1563745   | 1563971   |
| <i>PRPF8</i> | chr17 | 1563887   | 1564117   |
| <i>PRPF8</i> | chr17 | 1564063   | 1564336   |
| <i>PRPF8</i> | chr17 | 1564285   | 1564510   |
| <i>PRPF8</i> | chr17 | 1564433   | 1564659   |
| <i>PRPF8</i> | chr17 | 1564605   | 1564831   |
| <i>PRPF8</i> | chr17 | 1564777   | 1565008   |
| <i>PRPF8</i> | chr17 | 1564955   | 1565190   |
| <i>PRPF8</i> | chr17 | 1565131   | 1565355   |
| <i>PRPF8</i> | chr17 | 1565301   | 1565564   |
| <i>PRPF8</i> | chr17 | 1576250   | 1576476   |
| <i>PRPF8</i> | chr17 | 1576428   | 1576658   |
| <i>PRPF8</i> | chr17 | 1576596   | 1576822   |
| <i>PRPF8</i> | chr17 | 1576776   | 1577012   |
| <i>PRPF8</i> | chr17 | 1576964   | 1577237   |
| <i>PRPF8</i> | chr17 | 1577611   | 1577846   |
| <i>PRPF8</i> | chr17 | 1577797   | 1578059   |
| <i>PRPF8</i> | chr17 | 1578415   | 1578685   |
| <i>PRPF8</i> | chr17 | 1578787   | 1579013   |
| <i>PRPF8</i> | chr17 | 1578931   | 1579155   |
| <i>PRPF8</i> | chr17 | 1579091   | 1579316   |

|               |       |           |           |
|---------------|-------|-----------|-----------|
| <i>PRPF8</i>  | chr17 | 1579267   | 1579492   |
| <i>PRPF8</i>  | chr17 | 1579443   | 1579670   |
| <i>PRPF8</i>  | chr17 | 1579619   | 1579843   |
| <i>PRPF8</i>  | chr17 | 1579795   | 1580020   |
| <i>PRPF8</i>  | chr17 | 1579957   | 1580226   |
| <i>PRPF8</i>  | chr17 | 1580173   | 1580403   |
| <i>PRPF8</i>  | chr17 | 1580349   | 1580596   |
| <i>PRPF8</i>  | chr17 | 1580830   | 1581080   |
| <i>PRPF8</i>  | chr17 | 1581841   | 1582065   |
| <i>PRPF8</i>  | chr17 | 1581993   | 1582220   |
| <i>PRPF8</i>  | chr17 | 1582169   | 1582395   |
| <i>PRPF8</i>  | chr17 | 1582343   | 1582570   |
| <i>PRPF8</i>  | chr17 | 1582519   | 1582747   |
| <i>PRPF8</i>  | chr17 | 1582697   | 1582927   |
| <i>PRPF8</i>  | chr17 | 1582877   | 1583149   |
| <i>PRPF8</i>  | chr17 | 1583897   | 1584126   |
| <i>PRPF8</i>  | chr17 | 1584071   | 1584295   |
| <i>PRPF8</i>  | chr17 | 1584241   | 1584505   |
| <i>PRPF8</i>  | chr17 | 1584659   | 1584884   |
| <i>PRPF8</i>  | chr17 | 1584811   | 1585059   |
| <i>PRPF8</i>  | chr17 | 1585007   | 1585243   |
| <i>PRPF8</i>  | chr17 | 1585191   | 1585439   |
| <i>PRPF8</i>  | chr17 | 1585389   | 1585629   |
| <i>PRPF8</i>  | chr17 | 1586796   | 1587061   |
| <i>PRPF8</i>  | chr17 | 1587639   | 1587867   |
| <i>PRPF8</i>  | chr17 | 1587803   | 1588035   |
| <i>PRPF8</i>  | chr17 | 1587989   | 1588226   |
| <i>PTPN11</i> | chr12 | 112888162 | 112888418 |
| <i>PTPN11</i> | chr12 | 112926856 | 112927108 |
| <i>RAD21</i>  | chr12 | 8632388   | 8632615   |
| <i>RAD21</i>  | chrX  | 100057976 | 100058219 |
| <i>RAD21</i>  | chrX  | 100058339 | 100058565 |
| <i>RAD21</i>  | chrX  | 100058678 | 100058914 |
| <i>RAD21</i>  | chrX  | 100059031 | 100059555 |
| <i>RAD21</i>  | chrX  | 100059197 | 100059414 |
| <i>RAD21</i>  | chr8  | 117858054 | 117858284 |
| <i>RAD21</i>  | chr8  | 117858210 | 117858436 |
| <i>RAD21</i>  | chr8  | 117858352 | 117858576 |
| <i>RAD21</i>  | chr8  | 117858504 | 117858742 |
| <i>RAD21</i>  | chr8  | 117858684 | 117858910 |
| <i>RAD21</i>  | chr8  | 117858858 | 117859095 |
| <i>RAD21</i>  | chr8  | 117859038 | 117859266 |
| <i>RAD21</i>  | chr8  | 117859212 | 117859444 |
| <i>RAD21</i>  | chr8  | 117859388 | 117859628 |

|              |       |           |           |
|--------------|-------|-----------|-----------|
| <i>RAD21</i> | chr8  | 117859570 | 117859814 |
| <i>RAD21</i> | chr8  | 117859764 | 117859996 |
| <i>RAD21</i> | chr8  | 117861158 | 117861426 |
| <i>RAD21</i> | chr8  | 117862814 | 117863088 |
| <i>RAD21</i> | chr8  | 117864154 | 117864386 |
| <i>RAD21</i> | chr8  | 117864757 | 117865031 |
| <i>RAD21</i> | chr8  | 117866363 | 117866590 |
| <i>RAD21</i> | chr8  | 117866537 | 117866794 |
| <i>RAD21</i> | chr8  | 117868374 | 117868610 |
| <i>RAD21</i> | chr8  | 117868856 | 117869095 |
| <i>RAD21</i> | chr8  | 117869401 | 117869631 |
| <i>RAD21</i> | chr8  | 117869575 | 117869823 |
| <i>RAD21</i> | chr8  | 117870526 | 117870767 |
| <i>RAD21</i> | chr8  | 117874033 | 117874301 |
| <i>RAD21</i> | chr8  | 117875338 | 117875610 |
| <i>RAD21</i> | chr8  | 117878770 | 117879007 |
| <i>RAD21</i> | chr8  | 117878950 | 117879220 |
| <i>RAD21</i> | chr8  | 117886751 | 117887024 |
| <i>RAD21</i> | chr8  | 117886971 | 117887212 |
| <i>RUNX1</i> | chr21 | 36159971  | 36160195  |
| <i>RUNX1</i> | chr21 | 36160113  | 36160338  |
| <i>RUNX1</i> | chr21 | 36160259  | 36160483  |
| <i>RUNX1</i> | chr21 | 36160407  | 36160636  |
| <i>RUNX1</i> | chr21 | 36160573  | 36160827  |
| <i>RUNX1</i> | chr21 | 36160741  | 36160989  |
| <i>RUNX1</i> | chr21 | 36160921  | 36161146  |
| <i>RUNX1</i> | chr21 | 36161067  | 36161292  |
| <i>RUNX1</i> | chr21 | 36161207  | 36161431  |
| <i>RUNX1</i> | chr21 | 36161353  | 36161578  |
| <i>RUNX1</i> | chr21 | 36161495  | 36161720  |
| <i>RUNX1</i> | chr21 | 36161633  | 36161866  |
| <i>RUNX1</i> | chr21 | 36161787  | 36162011  |
| <i>RUNX1</i> | chr21 | 36161927  | 36162151  |
| <i>RUNX1</i> | chr21 | 36162065  | 36162291  |
| <i>RUNX1</i> | chr21 | 36162211  | 36162435  |
| <i>RUNX1</i> | chr21 | 36162349  | 36162574  |
| <i>RUNX1</i> | chr21 | 36162489  | 36162716  |
| <i>RUNX1</i> | chr21 | 36162627  | 36162851  |
| <i>RUNX1</i> | chr21 | 36162765  | 36162989  |
| <i>RUNX1</i> | chr21 | 36162909  | 36163134  |
| <i>RUNX1</i> | chr21 | 36163053  | 36163278  |
| <i>RUNX1</i> | chr21 | 36163191  | 36163416  |
| <i>RUNX1</i> | chr21 | 36163335  | 36163559  |
| <i>RUNX1</i> | chr21 | 36163479  | 36163703  |



|               |       |           |           |
|---------------|-------|-----------|-----------|
| <i>RUNX1</i>  | chr21 | 36163645  | 36163904  |
| <i>RUNX1</i>  | chr21 | 36163833  | 36164090  |
| <i>RUNX1</i>  | chr21 | 36164361  | 36164586  |
| <i>RUNX1</i>  | chr21 | 36164535  | 36164764  |
| <i>RUNX1</i>  | chr21 | 36164711  | 36164952  |
| <i>RUNX1</i>  | chr21 | 36171569  | 36171803  |
| <i>RUNX1</i>  | chr21 | 36193453  | 36193678  |
| <i>RUNX1</i>  | chr21 | 36193619  | 36193852  |
| <i>RUNX1</i>  | chr21 | 36193799  | 36194041  |
| <i>RUNX1</i>  | chr21 | 36206584  | 36206813  |
| <i>RUNX1</i>  | chr21 | 36206764  | 36207021  |
| <i>RUNX1</i>  | chr21 | 36231744  | 36232002  |
| <i>RUNX1</i>  | chr21 | 36252823  | 36253071  |
| <i>RUNX1</i>  | chr21 | 36259017  | 36259242  |
| <i>RUNX1</i>  | chr21 | 36259341  | 36259568  |
| <i>RUNX1</i>  | chr21 | 36259503  | 36259761  |
| <i>RUNX1</i>  | chr21 | 36259705  | 36259933  |
| <i>RUNX1</i>  | chr21 | 36259877  | 36260123  |
| <i>RUNX1</i>  | chr21 | 36260061  | 36260285  |
| <i>RUNX1</i>  | chr21 | 36260227  | 36260452  |
| <i>RUNX1</i>  | chr21 | 36260403  | 36260628  |
| <i>RUNX1</i>  | chr21 | 36260579  | 36260843  |
| <i>RUNX1</i>  | chr21 | 36260765  | 36261029  |
| <i>RUNX1</i>  | chr21 | 36260977  | 36261238  |
| <i>RUNX1</i>  | chr21 | 36265167  | 36265391  |
| <i>RUNX1</i>  | chr21 | 36421020  | 36421255  |
| <i>RUNX1</i>  | chr21 | 36421202  | 36421476  |
| <i>RUNX1</i>  | chr21 | 36421428  | 36421664  |
| <i>SETBP1</i> | chr18 | 42531804  | 42532043  |
| <i>SF3B1</i>  | chr2  | 198266684 | 198266908 |
| <i>SF3B1</i>  | chr2  | 198267329 | 198267565 |
| <i>SMC3</i>   | chr2  | 99719054  | 99719437  |
| <i>SMC3</i>   | chr10 | 112327412 | 112327644 |
| <i>SMC3</i>   | chr10 | 112328659 | 112328933 |
| <i>SMC3</i>   | chr10 | 112335019 | 112335275 |
| <i>SMC3</i>   | chr10 | 112337148 | 112337422 |
| <i>SMC3</i>   | chr10 | 112337510 | 112337742 |
| <i>SMC3</i>   | chr10 | 112338335 | 112338609 |
| <i>SMC3</i>   | chr10 | 112340621 | 112340867 |
| <i>SMC3</i>   | chr10 | 112341652 | 112341926 |
| <i>SMC3</i>   | chr10 | 112342203 | 112342455 |
| <i>SMC3</i>   | chr10 | 112343089 | 112343363 |
| <i>SMC3</i>   | chr10 | 112343478 | 112343708 |
| <i>SMC3</i>   | chr10 | 112343654 | 112343881 |

|       |       |           |           |
|-------|-------|-----------|-----------|
| SMC3  | chr10 | 112343820 | 112344052 |
| SMC3  | chr10 | 112343998 | 112344259 |
| SMC3  | chr10 | 112349236 | 112349503 |
| SMC3  | chr10 | 112349436 | 112349692 |
| SMC3  | chr10 | 112349642 | 112349866 |
| SMC3  | chr10 | 112350041 | 112350277 |
| SMC3  | chr10 | 112350221 | 112350467 |
| SMC3  | chr10 | 112350710 | 112350972 |
| SMC3  | chr10 | 112352800 | 112353057 |
| SMC3  | chr10 | 112356121 | 112356359 |
| SMC3  | chr10 | 112357864 | 112358089 |
| SMC3  | chr10 | 112359371 | 112359645 |
| SMC3  | chr10 | 112360154 | 112360398 |
| SMC3  | chr10 | 112360735 | 112360981 |
| SMC3  | chr10 | 112361266 | 112361491 |
| SMC3  | chr10 | 112361408 | 112361651 |
| SMC3  | chr10 | 112361598 | 112361828 |
| SMC3  | chr10 | 112361772 | 112362027 |
| SMC3  | chr10 | 112362105 | 112362330 |
| SMC3  | chr10 | 112362269 | 112362502 |
| SMC3  | chr10 | 112362443 | 112362672 |
| SMC3  | chr10 | 112362619 | 112362857 |
| SMC3  | chr10 | 112362781 | 112363012 |
| SMC3  | chr10 | 112362959 | 112363226 |
| SMC3  | chr10 | 112363886 | 112364124 |
| SMC3  | chr10 | 112364056 | 112364283 |
| SMC3  | chr10 | 112364222 | 112364477 |
| SMC3  | chr7  | 131246446 | 131246832 |
| STAG2 | chr2  | 98290091  | 98290572  |
| STAG2 | chr10 | 122931324 | 122931501 |
| STAG2 | chrX  | 123094350 | 123094592 |
| STAG2 | chrX  | 123094540 | 123094765 |
| STAG2 | chrX  | 123095517 | 123095745 |
| STAG2 | chrX  | 123155184 | 123155430 |
| STAG2 | chrX  | 123156344 | 123156614 |
| STAG2 | chrX  | 123159659 | 123159883 |
| STAG2 | chrX  | 123164684 | 123164909 |
| STAG2 | chrX  | 123164856 | 123165125 |
| STAG2 | chrX  | 123171302 | 123171528 |
| STAG2 | chrX  | 123176346 | 123176592 |
| STAG2 | chrX  | 123178887 | 123179154 |
| STAG2 | chrX  | 123179097 | 123179358 |
| STAG2 | chrX  | 123181163 | 123181403 |
| STAG2 | chrX  | 123182816 | 123183070 |

|       |      |           |           |
|-------|------|-----------|-----------|
| STAG2 | chrX | 123183997 | 123184261 |
| STAG2 | chrX | 123184844 | 123185112 |
| STAG2 | chrX | 123185056 | 123185327 |
| STAG2 | chrX | 123189947 | 123190221 |
| STAG2 | chrX | 123191611 | 123191883 |
| STAG2 | chrX | 123195043 | 123195315 |
| STAG2 | chrX | 123195570 | 123195820 |
| STAG2 | chrX | 123196623 | 123196850 |
| STAG2 | chrX | 123196785 | 123197014 |
| STAG2 | chrX | 123196961 | 123197204 |
| STAG2 | chrX | 123197571 | 123197800 |
| STAG2 | chrX | 123197745 | 123198002 |
| STAG2 | chrX | 123199597 | 123199821 |
| STAG2 | chrX | 123199739 | 123199964 |
| STAG2 | chrX | 123199881 | 123200108 |
| STAG2 | chrX | 123200053 | 123200277 |
| STAG2 | chrX | 123200221 | 123200463 |
| STAG2 | chrX | 123202343 | 123202615 |
| STAG2 | chrX | 123204956 | 123205226 |
| STAG2 | chrX | 123210153 | 123210403 |
| STAG2 | chrX | 123211754 | 123212004 |
| STAG2 | chrX | 123215199 | 123215463 |
| STAG2 | chrX | 123217142 | 123217390 |
| STAG2 | chrX | 123217336 | 123217609 |
| STAG2 | chrX | 123220270 | 123220501 |
| STAG2 | chrX | 123220452 | 123220698 |
| STAG2 | chrX | 123224300 | 123224527 |
| STAG2 | chrX | 123224474 | 123224731 |
| STAG2 | chrX | 123224676 | 123224930 |
| STAG2 | chrX | 123227827 | 123228093 |
| STAG2 | chrX | 123229183 | 123229427 |
| STAG2 | chrX | 123234295 | 123234527 |
| STAG2 | chrX | 123234469 | 123234702 |
| STAG2 | chrX | 123234633 | 123234894 |
| STAG2 | chrX | 123234837 | 123235111 |
| STAG2 | chrX | 123235053 | 123235278 |
| STAG2 | chrX | 123235199 | 123235428 |
| STAG2 | chrX | 123235343 | 123235571 |
| STAG2 | chrX | 123235513 | 123235745 |
| STAG2 | chrX | 123235691 | 123235928 |
| STAG2 | chrX | 123235869 | 123236098 |
| STAG2 | chrX | 123236037 | 123236262 |
| STAG2 | chrX | 123236189 | 123236414 |
| STAG2 | chrX | 123236357 | 123236622 |

|       |       |          |          |
|-------|-------|----------|----------|
| STAT3 | chr17 | 40475025 | 40475272 |
| STAT3 | chr17 | 40475221 | 40475461 |
| SUZ12 | chr17 | 29058574 | 29058844 |
| SUZ12 | chr17 | 29058799 | 29059050 |
| SUZ12 | chr17 | 29059001 | 29059239 |
| SUZ12 | chr17 | 29061994 | 29062263 |
| SUZ12 | chr17 | 29070278 | 29070514 |
| SUZ12 | chr17 | 29086454 | 29086711 |
| SUZ12 | chr17 | 29093452 | 29093678 |
| SUZ12 | chr17 | 29095723 | 29095950 |
| SUZ12 | chr17 | 29095899 | 29096158 |
| SUZ12 | chr17 | 29096823 | 29097047 |
| SUZ12 | chr17 | 29103280 | 29103514 |
| SUZ12 | chr17 | 30263935 | 30264206 |
| SUZ12 | chr17 | 30264161 | 30264424 |
| SUZ12 | chr17 | 30264375 | 30264637 |
| SUZ12 | chr17 | 30267178 | 30267443 |
| SUZ12 | chr17 | 30267384 | 30267657 |
| SUZ12 | chr17 | 30274595 | 30274831 |
| SUZ12 | chr17 | 30293109 | 30293367 |
| SUZ12 | chr17 | 30300096 | 30300322 |
| SUZ12 | chr17 | 30302372 | 30302599 |
| SUZ12 | chr17 | 30302548 | 30302808 |
| SUZ12 | chr17 | 30303473 | 30303697 |
| SUZ12 | chr17 | 30309983 | 30310217 |
| SUZ12 | chr17 | 30315304 | 30315577 |
| SUZ12 | chr17 | 30320142 | 30320372 |
| SUZ12 | chr17 | 30320314 | 30320560 |
| SUZ12 | chr17 | 30320839 | 30321081 |
| SUZ12 | chr17 | 30321458 | 30321700 |
| SUZ12 | chr17 | 30321648 | 30321905 |
| SUZ12 | chr17 | 30322460 | 30322699 |
| SUZ12 | chr17 | 30322642 | 30322877 |
| SUZ12 | chr17 | 30323786 | 30324042 |
| SUZ12 | chr17 | 30325596 | 30325836 |
| SUZ12 | chr17 | 30325778 | 30326006 |
| SUZ12 | chr17 | 30325952 | 30326178 |
| SUZ12 | chr17 | 30326122 | 30326372 |
| SUZ12 | chr17 | 30326286 | 30326533 |
| SUZ12 | chr17 | 30326448 | 30326688 |
| SUZ12 | chr17 | 30326630 | 30326873 |
| SUZ12 | chr17 | 30326812 | 30327041 |
| SUZ12 | chr17 | 30326980 | 30327253 |
| SUZ12 | chr17 | 30327168 | 30327429 |

|       |       |           |           |
|-------|-------|-----------|-----------|
| SUZ12 | chr17 | 30327368  | 30327593  |
| SUZ12 | chr17 | 30327536  | 30327760  |
| SUZ12 | chr17 | 30327702  | 30327932  |
| SUZ12 | chr17 | 30327876  | 30328147  |
| TET2  | chr6  | 3847213   | 3847441   |
| TET2  | chr3  | 5871749   | 5871959   |
| TET2  | chr20 | 7430743   | 7430971   |
| TET2  | chr4  | 17676983  | 17677190  |
| TET2  | chr7  | 18587336  | 18587747  |
| TET2  | chr21 | 23677856  | 23678082  |
| TET2  | chr16 | 25681182  | 25681405  |
| TET2  | chr14 | 31802840  | 31803353  |
| TET2  | chr9  | 31813242  | 31813468  |
| TET2  | chrX  | 33340391  | 33340622  |
| TET2  | chr12 | 33600790  | 33601017  |
| TET2  | chr18 | 42986805  | 42987032  |
| TET2  | chrX  | 50630067  | 50630284  |
| TET2  | chr7  | 55520298  | 55520498  |
| TET2  | chr3  | 57672384  | 57672612  |
| TET2  | chr5  | 57732615  | 57732843  |
| TET2  | chr5  | 59272699  | 59272926  |
| TET2  | chr8  | 70880182  | 70880421  |
| TET2  | chr2  | 72175292  | 72175506  |
| TET2  | chr8  | 72361723  | 72361952  |
| TET2  | chr3  | 74445091  | 74445335  |
| TET2  | chr13 | 85769283  | 85769506  |
| TET2  | chr6  | 89659690  | 89659909  |
| TET2  | chr8  | 93327960  | 93328189  |
| TET2  | chr1  | 96591803  | 96592015  |
| TET2  | chr8  | 97037591  | 97037821  |
| TET2  | chr4  | 99522222  | 99522433  |
| TET2  | chr4  | 106067916 | 106068185 |
| TET2  | chr4  | 106111486 | 106111748 |
| TET2  | chr4  | 106154927 | 106155152 |
| TET2  | chr4  | 106155075 | 106155300 |
| TET2  | chr4  | 106155215 | 106155439 |
| TET2  | chr4  | 106155359 | 106155583 |
| TET2  | chr4  | 106155505 | 106155729 |
| TET2  | chr4  | 106155649 | 106155874 |
| TET2  | chr4  | 106155787 | 106156011 |
| TET2  | chr4  | 106155929 | 106156153 |
| TET2  | chr4  | 106156067 | 106156291 |
| TET2  | chr4  | 106156207 | 106156432 |
| TET2  | chr4  | 106156351 | 106156576 |

|             |      |           |           |
|-------------|------|-----------|-----------|
| <i>TET2</i> | chr4 | 106156493 | 106156717 |
| <i>TET2</i> | chr4 | 106156635 | 106156859 |
| <i>TET2</i> | chr4 | 106156775 | 106157000 |
| <i>TET2</i> | chr4 | 106156937 | 106157161 |
| <i>TET2</i> | chr4 | 106157081 | 106157305 |
| <i>TET2</i> | chr4 | 106157221 | 106157446 |
| <i>TET2</i> | chr4 | 106157513 | 106157737 |
| <i>TET2</i> | chr4 | 106157653 | 106157878 |
| <i>TET2</i> | chr4 | 106157795 | 106158022 |
| <i>TET2</i> | chr4 | 106157943 | 106158167 |
| <i>TET2</i> | chr4 | 106158087 | 106158311 |
| <i>TET2</i> | chr4 | 106158253 | 106158478 |
| <i>TET2</i> | chr4 | 106158389 | 106158617 |
| <i>TET2</i> | chr4 | 106158539 | 106158765 |
| <i>TET2</i> | chr4 | 106158683 | 106158907 |
| <i>TET2</i> | chr4 | 106158823 | 106159048 |
| <i>TET2</i> | chr4 | 106158969 | 106159214 |
| <i>TET2</i> | chr4 | 106159153 | 106159400 |
| <i>TET2</i> | chr4 | 106159343 | 106159567 |
| <i>TET2</i> | chr4 | 106159483 | 106159708 |
| <i>TET2</i> | chr4 | 106159625 | 106159853 |
| <i>TET2</i> | chr4 | 106159771 | 106159997 |
| <i>TET2</i> | chr4 | 106159921 | 106160148 |
| <i>TET2</i> | chr4 | 106160089 | 106160320 |
| <i>TET2</i> | chr4 | 106160251 | 106160477 |
| <i>TET2</i> | chr4 | 106160857 | 106161086 |
| <i>TET2</i> | chr4 | 106161019 | 106161254 |
| <i>TET2</i> | chr4 | 106161185 | 106161441 |
| <i>TET2</i> | chr4 | 106161385 | 106161610 |
| <i>TET2</i> | chr4 | 106161553 | 106161782 |
| <i>TET2</i> | chr4 | 106161731 | 106161968 |
| <i>TET2</i> | chr4 | 106161901 | 106162125 |
| <i>TET2</i> | chr4 | 106162063 | 106162336 |
| <i>TET2</i> | chr4 | 106162275 | 106162544 |
| <i>TET2</i> | chr4 | 106162485 | 106162719 |
| <i>TET2</i> | chr4 | 106162641 | 106162877 |
| <i>TET2</i> | chr4 | 106162819 | 106163048 |
| <i>TET2</i> | chr4 | 106162977 | 106163201 |
| <i>TET2</i> | chr4 | 106163147 | 106163372 |
| <i>TET2</i> | chr4 | 106163305 | 106163530 |
| <i>TET2</i> | chr4 | 106163469 | 106163719 |
| <i>TET2</i> | chr4 | 106163663 | 106163888 |
| <i>TET2</i> | chr4 | 106163823 | 106164051 |
| <i>TET2</i> | chr4 | 106163997 | 106164251 |

|              |       |           |           |
|--------------|-------|-----------|-----------|
| <i>TET2</i>  | chr4  | 106164600 | 106164838 |
| <i>TET2</i>  | chr4  | 106164784 | 106165026 |
| <i>TET2</i>  | chr4  | 106180745 | 106181005 |
| <i>TET2</i>  | chr4  | 106182853 | 106183085 |
| <i>TET2</i>  | chr4  | 106190740 | 106190993 |
| <i>TET2</i>  | chr4  | 106193596 | 106193822 |
| <i>TET2</i>  | chr4  | 106193764 | 106194021 |
| <i>TET2</i>  | chrX  | 113733329 | 113733552 |
| <i>TET2</i>  | chr4  | 130405906 | 130406104 |
| <i>TET2</i>  | chr4  | 131884887 | 131885113 |
| <i>TET2</i>  | chr6  | 149737559 | 149737784 |
| <i>TET2</i>  | chr2  | 150042376 | 150042602 |
| <i>TET2</i>  | chr6  | 150875148 | 150875371 |
| <i>TET2</i>  | chr7  | 154495729 | 154495956 |
| <i>TET2</i>  | chr5  | 157272936 | 157273146 |
| <i>TET2</i>  | chr3  | 164560378 | 164560593 |
| <i>TET2</i>  | chr4  | 166845929 | 166846155 |
| <i>TET2</i>  | chr2  | 170525082 | 170525310 |
| <i>TET2</i>  | chr1  | 191455791 | 191456020 |
| <i>TET2</i>  | chr1  | 228687327 | 228687764 |
| <i>TP53</i>  | chr17 | 7571623   | 7571854   |
| <i>TP53</i>  | chr17 | 7572181   | 7572405   |
| <i>TP53</i>  | chr17 | 7572345   | 7572575   |
| <i>TP53</i>  | chr17 | 7572519   | 7572753   |
| <i>TP53</i>  | chr17 | 7572701   | 7572953   |
| <i>TP53</i>  | chr17 | 7572901   | 7573127   |
| <i>TP53</i>  | chr17 | 7573904   | 7574178   |
| <i>TP53</i>  | chr17 | 7576588   | 7576826   |
| <i>TP53</i>  | chr17 | 7576772   | 7577005   |
| <i>TP53</i>  | chr17 | 7576956   | 7577194   |
| <i>TP53</i>  | chr17 | 7578052   | 7578281   |
| <i>TP53</i>  | chr17 | 7578230   | 7578455   |
| <i>TP53</i>  | chr17 | 7578410   | 7578634   |
| <i>TP53</i>  | chr17 | 7590666   | 7590928   |
| <i>U2AF1</i> | chr21 | 44514750  | 44515010  |
| <i>U2AF1</i> | chr21 | 44524429  | 44524703  |
| <i>WT1</i>   | chr11 | 32409197  | 32409441  |
| <i>WT1</i>   | chr11 | 32409385  | 32409658  |
| <i>WT1</i>   | chr11 | 32409585  | 32409821  |
| <i>WT1</i>   | chr11 | 32409765  | 32409993  |
| <i>WT1</i>   | chr11 | 32409921  | 32410185  |
| <i>WT1</i>   | chr11 | 32410129  | 32410353  |
| <i>WT1</i>   | chr11 | 32410299  | 32410533  |
| <i>WT1</i>   | chr11 | 32410477  | 32410706  |

|       |       |           |           |
|-------|-------|-----------|-----------|
| WT1   | chr11 | 32410657  | 32410895  |
| WT1   | chr11 | 32413487  | 32413749  |
| WT1   | chr11 | 32417778  | 32418052  |
| WT1   | chr11 | 32421467  | 32421723  |
| WT1   | chr11 | 32438007  | 32438236  |
| WT1   | chr11 | 32439092  | 32439340  |
| WT1   | chr11 | 32449479  | 32449710  |
| WT1   | chr11 | 32450016  | 32450272  |
| WT1   | chr11 | 32451957  | 32452184  |
| WT1   | chr11 | 32452135  | 32452388  |
| WT1   | chr11 | 32456121  | 32456346  |
| WT1   | chr11 | 32456291  | 32456547  |
| WT1   | chr11 | 32456659  | 32456884  |
| WT1   | chr11 | 32456839  | 32457068  |
| WT1   | chr11 | 32457015  | 32457286  |
| ZRSR2 | chrX  | 15808545  | 15808778  |
| ZRSR2 | chrX  | 15809026  | 15809262  |
| ZRSR2 | chrX  | 15817958  | 15818232  |
| ZRSR2 | chrX  | 15821772  | 15821998  |
| ZRSR2 | chrX  | 15822203  | 15822473  |
| ZRSR2 | chrX  | 15826325  | 15826596  |
| ZRSR2 | chrX  | 15827292  | 15827558  |
| ZRSR2 | chrX  | 15836641  | 15836866  |
| ZRSR2 | chrX  | 15838297  | 15838533  |
| ZRSR2 | chrX  | 15840735  | 15840965  |
| ZRSR2 | chrX  | 15840907  | 15841133  |
| ZRSR2 | chrX  | 15841077  | 15841309  |
| ZRSR2 | chr5  | 112228512 | 112228720 |

### **Sample Processing, DNA Sequencing and Mutational Analysis**

Genomic DNA was extracted from peripheral blood and bone marrow mononuclear cells per manufacturer's protocol. Direct sequencing was performed on coding exons of 60 genes (listed above) using the Illumina TrueSeq Custom Amplicon kit (San Diego, CA, USA). The mean sequencing coverage for the targeted regions was 650 x. For germline confirmation, mutations were analyzed in non-clonal CD3p cells whenever DNA was available (in 200 samples where whole-exome sequencing was performed). Bidirectional sequencing was performed by standard techniques using an ABI 3730xl DNA analyser (Applied Biosystems, Foster City, CA, USA). Putative variants were extracted using GATK3.3 pipeline, following recommended best practices for variant discovery. Variants with at least 10 positive reads and a variant allele frequency of 5% were prioritized for further processing and annotation. VCF files generated were used as an input for Annovar and were annotated with multiple databases (dbSNP138, COSMIC, ExacDb). Variants found in ExacDb with allelic frequency 40.0001 were excluded as germline variants.



**Table 2: Patient characteristics**

| Characteristics                    | BCOR <sup>WT</sup> | BCOR <sup>Mut</sup> | p    | BCORL1 <sup>WT</sup> | BCORL1 <sup>Mut</sup> | p    |
|------------------------------------|--------------------|---------------------|------|----------------------|-----------------------|------|
| <b>Number (%)</b>                  | 592 (95)           | 29 (5)              |      | 608 (98)             | 13 (2)                |      |
| <b>Age, years</b>                  |                    |                     |      |                      |                       |      |
| Median                             | 69                 | 63                  | .04  | 67                   | 69                    | .3   |
| Range                              | 18-101             | 35-83               |      | 18-101               | 47-81                 |      |
| <b>Gender (%)</b>                  |                    |                     |      |                      |                       |      |
| Female                             | 38                 | 34                  | .67  | 38                   | 46                    | .54  |
| Male                               | 62                 | 66                  |      | 62                   | 54                    |      |
| <b>WBC, 10<sup>9</sup>/L</b>       |                    |                     |      |                      |                       |      |
| Median                             | 4                  | 2.7                 | .35  | 4                    | 2.7                   | .02  |
| Range                              | .62-179            | .9-69               |      | .62-179              | .7-9.2                |      |
| <b>ANC, 10<sup>9</sup>/L</b>       |                    |                     |      |                      |                       |      |
| Median                             | 1.8                | 1.31                | .41  | 1.8                  | 1.3                   | .15  |
| Range                              | 0-170              | .18-165             |      | 0-170                | .18-6.9               |      |
| <b>Hemoglobin, g/dL</b>            |                    |                     |      |                      |                       |      |
| Median                             | 9.7                | 9.5                 | 0.31 | 9.8                  | 9.7                   | .54  |
| Range                              | 3.9-15.9           | 6.9-14.5            |      | 3.9-15.9             | 7.2-13                |      |
| <b>Platelets, 10<sup>9</sup>/L</b> |                    |                     |      |                      |                       |      |
| Median                             | 93                 | 62                  | .01  | 91                   | 72                    | .07  |
| Range                              | 4-975              | 13-768              |      | 4-975                | 9-247                 |      |
| <b>Cytogenetics per IPSS-R</b>     |                    |                     |      |                      |                       |      |
| Very Good                          | 2                  | 3                   | .6   | 2                    | 15                    | .001 |
| Good                               | 62                 | 65                  | .7   | 62                   | 77                    | .20  |
| Intermediate                       | 17                 | 10                  | .3   | 17                   | 0                     | .09  |
| Poor                               | 7                  | 13                  | .2   | 8                    | 7                     | .90  |
| Very Poor                          | 9                  | 6                   | .6   | 9                    | 0                     | .24  |
| <b>IPSS-R Category</b>             |                    |                     |      |                      |                       |      |
| Very Low                           | 16                 | 10                  | .2   | 16                   | 23                    | .5   |
| Low                                | 40                 | 31                  | .3   | 40                   | 7                     | .01  |
| Intermediate                       | 18                 | 24                  | .4   | 18                   | 46                    | .01  |
| High                               | 14                 | 17                  | .6   | 14                   | 15                    | .9   |
| Very High                          | 10                 | 13                  | .5   | 10                   | 7                     | .7   |
| <b>% Progression to AML</b>        |                    |                     |      |                      |                       |      |
| Yes                                | 17                 | 34                  | .01  | 16                   | 46                    | .05  |
| No                                 | 83                 | 66                  |      | 83                   | 53                    |      |

Abbreviations: WBC: white blood count; ANC: Absolute Neutrophil Count; IPSS R: Revised International Prognostic Scoring System; AML: Acute Myeloid Leukemia.
